# Supplementary material
Source: PubMed Central journal article supplement (PMC3945001)
Supplement: NIHMS544473-supplement-01.pdf [file NIHMS544473-supplement-01.pdf]

**Supplemental Table 1. Meta-Analysis of Total SCD**

| <b>Overall</b> |              | <b>HR (per 10cm)</b> | <b>CI<sub>Lower</sub></b> | <b>CI<sub>Upper</sub></b> | <b>P value</b> |
|----------------|--------------|----------------------|---------------------------|---------------------------|----------------|
|                | <b>BM</b>    | 0.82                 | 0.72                      | 0.94                      | 0.005          |
|                | <b>BM+RF</b> | 0.83                 | 0.72                      | 0.95                      | 0.005          |
| <b>Women</b>   |              |                      |                           |                           |                |
|                | <b>BM</b>    | 0.91                 | 0.73                      | 1.13                      | 0.39           |
|                | <b>BM+RF</b> | 0.88                 | 0.70                      | 1.10                      | 0.26           |
| <b>Men</b>     |              |                      |                           |                           |                |
|                | <b>BM</b>    | 0.77                 | 0.65                      | 0.91                      | 0.002          |
|                | <b>BM+RF</b> | 0.80                 | 0.68                      | 0.95                      | 0.009          |

Base Model (BM): Adjusted for age, sex, race, study location, Smoking status (current, former, and never), and education. Risk Factors: Waist Circumference, HTN, resting heart rate (bpm), diabetes, prevalent heart failure, stroke, or coronary heart disease, and ECG-defined LVH.

**Supplemental Table 2. Meta-Analysis with Incident non-fatal CHD**

|                |                 | <b>HR (per 10cm)</b> | <b>CI<sub>Lower</sub></b> | <b>CI<sub>Upper</sub></b> | <b>P value</b> |
|----------------|-----------------|----------------------|---------------------------|---------------------------|----------------|
| <b>Model 1</b> | CHS             | 0.91                 | 0.73                      | 1.14                      | 0.40           |
|                | ARIC            | 0.78                 | 0.63                      | 0.97                      | 0.03           |
|                | <i>Combined</i> | 0.84                 | 0.72                      | 0.98                      | 0.03           |
| <b>Model 2</b> | CHS             | 0.92                 | 0.74                      | 1.16                      | 0.49           |
|                | ARIC            | 0.79                 | 0.64                      | 0.99                      | 0.03           |
|                | <i>Combined</i> | 0.85                 | 0.73                      | 1.00                      | 0.05           |

All models adjusted for age, sex, race, study location, Smoking status (current, former, and never), education, waist Circumference, HTN, resting heart rate (bpm), diabetes, prevalent heart failure, stroke, and ECG-defined LVH. **Model 1** includes prevalent CHD as incident nonfatal CHD present at time 0. **Model 2** includes prevalent CHD as a separate covariate.
